# Supplementary material
Source: publisher site journal article supplement (https://www.dovepress.com/article/123785)
Supplement: Supplementary file 1 [file get_supplementary_file.php]

Table with columns: SNP ID, SNP Type, and 10 columns of values (e.g., 0.007, 0.974, 0.226, 0.236, etc.).

Table with columns: SNP ID, SNP Type, and 10 columns of values (e.g., 0.033, 0.783, -0.028, 0.797, etc.).

Table with columns: SNP ID, SNP Type, and 10 columns of values (e.g., -0.144, 0.475, 0.091, 0.616, etc.).

Table with columns: SNP ID, SNP Type, and 10 columns of values (e.g., -0.131, 0.368, -0.040, 0.753, etc.).

Table with columns: SNP ID, SNP Type, and 10 columns of values (e.g., -0.087, 0.691, -0.119, 0.539, etc.).

Table with columns: SNP ID, SNP Type, and 10 columns of values (e.g., 0.149, 0.250, 0.163, 0.153, etc.).
